# Supplementary material
Source: publisher figshare collection journal article supplement (https://rs.figshare.com/ndownloader/files/16387751)
Supplement: Supplementary file 1 [file 16387751]

**Supplementary Table 1.** Single visit deposit observations by birds on *Aloe ferox* at Ashburton. Each row (N) represents a visitation bout per bird species, specifying the number of flowers collected per visitation bout.

| Pollinator | N | Date & Time | Number of flowers collected | Plant individual |
| --- | --- | --- | --- | --- |
| Bulbul | 1 | 17 July 2017 / 7:59 | 3 | 58 |
|  | 2 | 17 July 2017 / 10:05 | 6 | 55 |
|  | 3 | 17 July 2017 / 10:49 | 17 | 58 |
|  | 4 | 22 July 2017 / 8:36 | 4 | 67 |
|  | 5 | 22 July 2017 / 10:30 | 21 | 65 |
|  | 6 | 26 July 2017 / 11:30 | 8 | 69 |
|  | 7 | 26 July 2017 / 13:05 | 1 | NA |
|  | 8 | 10 August 2017 / 15:30 | 19 | NA |
|  | 9 | 11 August 2017 /14:00 | 8 | NA |
|  | 10 | 11 August 2017 / 17:00 | 5 | NA |
| Weaver | 1 | 17 July2017/12:25 | 5 | 41 |
|  | 2 | 20 July 2017 / NA | 4 | NA |
|  | 3 | 7 August 2017 / 11:15 | 13 | NA |
|  | 4 | 10 August 2017 / 15:30 | 15 | NA |
|  | 5 | 11 August 2017 / 17:00 | 8 | NA |
| Glossy starling | 1 | 13 July 2017 / 10:30 | 11 | NA |
|  | 2 | 17 July 2017 / 8:00 | 6 | 55 |
|  | 3 | 18 July 2017 / 7:46 | 3 | NA |
|  | 4 | 18 July 2017 / 8:50 | 24 | 53 |
|  | 5 | 20 July 2017 / 8:12 | 14 | 56 |
|  | 6 | 20 July 2017 / NA | 11 | 63 |
| Sunbird | 1 | 26 July 2017 / 14:05 | 3 | 92 |
|  | 2 | 26 July 2017 / 14:18 | 12 | 92 |
|  | 3 | 6 August 2017 / 9:48 | 2 | NA |
|  | 4 | 10 August 2017 / am | 7 | NA |

**Supplementary Table 2.** Single visit deposit observations by honeybees on *Aloe ferox* at Ashburton. Observations were done across 8 days on different plant individuals. Each flower collected consisted of a single probe by a honeybee.

| Date | Plant individual | Number of flowers collected |
| --- | --- | --- |
|
| NA | 6 | 6 |
| 14 July 2017 | 47 | 1 |
| 15 July 2017 | NA | 5 |
| 18 July 2017 | 48 | 18 |
| 22 July 2017 | 63 | 19 |
| 29 July 2017 | 81 | 16 |
| 2 Aug 2017 | 103 | 16 |
| 5 Aug 2017 | 104 | 21 |
